1 **The Anadromous Hickory Shad (Clupeiformes: Clupeidae, *Alosa mediocris* [Mitchill**  
2 **1814]): Morphometric and Meristic Variation**

3  
4 Jordan P. Smith, Department of Biology, East Carolina University, Greenville, NC 27858  
5 Michael S. Brewer, Department of Biology, East Carolina University, Greenville, NC 27858  
6 Roger A. Rulifson, Department of Biology, East Carolina University, Greenville, NC 27858

7  
8 Author contact: [rulifsonr@ecu.edu](mailto:rulifsonr@ecu.edu)  
9

10 **Abstract**

11 The anadromous Hickory Shad *Alosa mediocris* (Mitchill, 1814) (Clupeiformes:  
12 Clupeidae) is reviewed, specifically regarding morphometric and meristic variation. Despite its  
13 long history as recognized species, few descriptions of Hickory Shad morphometric and meristic  
14 characters exist in the literature. Most authors of the historic literature have failed to provide  
15 capture location for specimens, analyze large numbers of Hickory Shad, or document how  
16 morphometric and meristic characters of the species vary spatially. To address this information  
17 gap, a total of 717 mature Hickory Shad were collected from 23 different locations in Maryland,  
18 Delaware, Virginia, North Carolina, South Carolina, Georgia, and Florida using electroshocking,  
19 gill net, or rod and reel. All specimens were frozen, thawed, and 17 morphometric characters and  
20 four meristic characters were examined; a random subset (n = 463) were analyzed for an  
21 additional four meristic counts of gill rakers. Overall specimens ranged from 206-389 mm SL  
22 with a mean  $\pm$  SD of  $278.41 \pm 27.69$  mm, 232-435 mm FL with a mean of  $310.98 \pm 30.35$  mm,  
23 and 272-508 mm TL with a mean of  $365.62 \pm 35.52$  mm. The linear relationships between FL  
24 and TL, and FL and SL, were investigated and found to be:  $TL = 1.169*FL + 1.660$  (n=705,  
25  $r^2=0.995$ ) and  $SL = 0.909*FL - 4.274$  (n=717,  $r^2=0.992$ ). Substantial differences in character  
26 means for many morphometric measurements were found between male and female specimens,  
27 suggesting strong sexual dimorphisms relating to shape. However, meristic characters did not  
28 show differences in character means by sex. No one morphometric measurement could  
29 distinguish Hickory Shad from other morphologically similar clupeids, but the meristic count of  
30 gill rakers on the lower limb of the first arch were important to separate Hickory Shad (19-22)  
31 from American Shad *A. sapidissima* (Wilson, 1811), Alewife *A. pseudoharengus* (Wilson, 1811),  
32 and Blueback Herring *A. aestivalis* (Mitchill, 1814).  
33

34 **Introduction**

35 No published study has examined and described an extensive set of morphometric and  
36 meristic characters of the Hickory Shad *Alosa mediocris* (Mitchill, 1814) (Clupeiformes:  
37 Clupeidae). The initial description of Hickory Shad lacked some critical information, indicating  
38 that this was a species unknown to the system and proceeded to describe it from “fresh  
39 specimens.” Unfortunately there is no reference to the capture location of the fish nor quantity

40 examined. It is possible that the description could have been based from one or several  
41 individuals. We speculate that the likely watershed from which Mitchill collected his  
42 specimen(s) was the Hudson River due to its close proximity to Columbia University.

43 Few records exist of Mitchill's early attempts to describe New York fauna, including *A.*  
44 *mediocris*. Perhaps Professor Mitchill took students to the shores of the Hudson River to observe  
45 fauna from pulling small seines; unless more early writings of Professor Mitchill are discovered,  
46 the locations and manner of these ichthyological collections will remain unknown. One or more  
47 of those specimens collected was an undescribed species of "Shad", which he presumably took  
48 back to his laboratory for examination and decided the specimen(s) fit within the family  
49 Clupeidae. Mitchill proceeded to designate the species *Clupea mediocris* – the "Staten Island  
50 Herring". In a presumably similar manner, Mitchill also described 11 other new species during  
51 that era (including what is now known as *Alosa aestivalis* (Mitchill, 1814), the Blueback  
52 Herring) although all 12 new "Mitchillian" species, including the current-day Hickory Shad and  
53 Blueback Herring, were placed in different genera by subsequent authorities [1].

54 Unfortunately, the original description of the Hickory Shad contained only a sparse  
55 description of the anatomical features. Mitchill [2] included basic descriptions of the fish shape,  
56 color, size, and meristic counts for branchiostegal, pectoral, ventral, anal, dorsal, and caudal fin  
57 rays, but he did not include any information on morphological measurements or ratios of size  
58 between various body features. Interestingly, many researchers describing the few characteristics  
59 of this species did so citing other investigators, who in turn cited Mitchill [2]. Therefore, little  
60 additional meristic or morphological information has been recorded for the species since the  
61 original description, over 200 years ago.

62 In addition, no record can be located of the holotype, nor where or when the specimen  
63 was collected. During this time of budding taxonomy in America, it was neither common nor  
64 required to keep holotype specimens for newly described species. Other taxonomists after  
65 Mitchill revised the taxonomic status of the Hickory Shad. Notably, the genus *Alosa* was divided  
66 into three genera by Regan [3] in 1917: *Alosa*, *Caspialosa*, and *Pomolobus*; the Hickory Shad  
67 was classified under the genus *Pomolobus* along with the Alewife and the Blueback Herring [4].  
68 Later work by Bailey [5] and Svetovidov [6] led to synonymizing the genera *Pomolobus* and  
69 *Caspialosa* with the genus *Alosa*, thereby changing the scientific name of Hickory Shad from  
70 *Pomolobus mediocris* to *A. mediocris* (Mitchill, 1814) [4].

71 Mansueti [7] examined the hypothesis that the Hickory Shad might be a hybrid between  
72 the American Shad *Alosa sapidissima* (Wilson, 1811) and one of the River Herrings, the Alewife  
73 *Alosa pseudoharengus* (Wilson, 1811) or the Blueback Herring *A. aestivalis*. He concluded that  
74 hybridization was unlikely and “not substantiated by any reliable evidence” [7]. Around this  
75 time, a few fish culturists experimented in hatcheries and actively pursued creating hybrids  
76 involving Hickory Shad and River Herring, though none of these attempts were successful [7].

77 The objective of this manuscript is to fully describe the various anatomical features,  
78 including meristic counts and morphological measurements, of the Hickory Shad across its  
79 range. The Hickory Shad is considered an understudied fish species though it spawns in rivers on  
80 the United States Eastern Seaboard from the Schuylkill River in the Delaware River watershed  
81 [8] to the St. Johns River in Florida [9]. The northern range limit of Hickory Shad spawning  
82 populations is not precisely known; early authors hypothesized spawning as far north as Maine  
83 [10]. A spawning population is suspected in Wethersfield Cove in the Connecticut River near  
84 Wethersfield, Connecticut, but evidence is lacking; adult Hickory Shad have been collected from

85 that area during spring (Ken Sprankle, USFWS, personal communication). Rulifson [11]  
86 reported that Connecticut is the northernmost state having a presence of Hickory Shad based on  
87 responses to questionnaires by respective state fisheries biologists. It is possible some of these  
88 northern accounts of Hickory Shad are either misidentifications with morphologically similar  
89 species, such as the American Shad *A. sapidissima*, or possibly wandering Hickory Shad  
90 collected in bays or the Atlantic Ocean, but not actively spawning. The Hickory Shad is a  
91 schooling species of the family Clupeidae and utilizes the life history strategy of anadromy,  
92 entering coastal freshwater between February and June to spawn; the higher latitudes correspond  
93 to later dates of entry into freshwater [12].

94         Relatively few authors have included morphometric and meristic values for Hickory Shad  
95 [13], [14], [15], [10], [16], [17], [18] but none investigated how these characters vary spatially.  
96 Most previous studies fail to provide capture location(s) for the specimens examined and cover  
97 many fewer characters than the present study. Furthermore, some authors provide only one value  
98 for various meristic counts and morphometric measurements, when in reality there is often  
99 considerable variation. No published study has described Hickory Shad specimens across such a  
100 large latitudinal gradient, covering the majority of the species range. Similar studies have been  
101 undertaken for the American Shad [19], Alewife, and Blueback Herring [20].

102         Historically, morphometric and meristic analyses of fish have been valuable tools for  
103 early ichthyologists and naturalists alike [21]. Starting in 1894, the Royal Society of the United  
104 Kingdom created the “Committee for Conducting Statistical Inquiries into the Measurable  
105 Characters of Plants and Animals.” One of the committee’s chief tasks was to investigate  
106 morphometric variation in Atlantic Herring *Clupea harengus* (Linneaus, 1758) [22]. Analysis of

107 morphological and meristic characters of fish is straightforward, cost-efficient, and an often-used  
108 tool to identify and differentiate fish species, stocks, and populations [23].

109

## 110 **Methods**

111

112 Hickory Shad specimens were collected during the 2016 and 2017 spawning runs from  
113 the Susquehanna and Patapsco rivers, Maryland; the Nanticoke River, Delaware; the  
114 Rappahannock, Appomattox, and James rivers, Virginia; the Chowan River headwaters  
115 (Meherrin, Nottaway, and Blackwater), also in Virginia; the Roanoke, Cashie, Pungo, Pamlico,  
116 Tar, Neuse, New, and Cape Fear rivers, North Carolina; Pamlico Sound, also in North Carolina;  
117 the Waccamaw and Santee rivers, South Carolina; the Altamaha River, Georgia, and the St.  
118 Johns River, Florida (Table 1). In addition, a few specimens (n=5) were obtained from the  
119 Atlantic Ocean close to shore, near Wrightsville Beach, North Carolina. Relative location of  
120 rivers as well as collection sites are depicted in Figure 1. All specimens were collected from the  
121 different locations by recreational angling (i.e., rod and reel), gill net, or electrofishing.  
122 Specimens from rivers outside of North Carolina were collected and donated to this study by the  
123 respective state or federal fisheries agencies. North Carolina fish came from the North Carolina  
124 Wildlife Resources Commission (NCWRC) or the North Carolina Division of Marine Fisheries  
125 (NCDMF). Additional sampling was conducted by the Rulifson Lab with electrofishing and rod  
126 and reel (NC Scientific Collection Permit Number 17-SFC00133; East Carolina University AUP  
127 #D330).

128

129

130

Table 1. List of states and river (north to south), sex, and total number of Hickory Shad collected in 2016 and 2017.

| State          | River                  | Sex        |            |           | Total      |
|----------------|------------------------|------------|------------|-----------|------------|
|                |                        | Female     | Male       | Unknown   |            |
| Maryland       | Susquehanna R.         | 13         | 9          |           | 22         |
| Maryland       | Patapsco R.            | 11         | 39         |           | 50         |
| Delaware       | Nanticoke R.           | 16         | 6          |           | 22         |
| Virginia       | Rappahannock R.        | 23         | 21         | 3         | 47         |
| Virginia       | Appomattox R.          | 25         | 25         |           | 50         |
| Virginia       | James R.               | 26         | 37         | 2         | 65         |
| Virginia       | Chowan R. (Meherrin)   |            | 1          |           | 1          |
| Virginia       | Chowan R. (Nottaway)   | 7          | 11         |           | 18         |
| Virginia       | Chowan R. (Blackwater) | 13         | 11         | 1         | 25         |
| North Carolina | Roanoke R.             | 21         | 23         |           | 44         |
| North Carolina | Cashie R.              | 17         | 17         |           | 34         |
| North Carolina | Pamlico Sound          | 63         | 29         | 2         | 94         |
| North Carolina | Pungo R.               |            | 2          | 1         | 3          |
| North Carolina | Pamlico R.             | 39         | 24         | 1         | 64         |
| North Carolina | Tar R.                 | 31         | 20         | 1         | 52         |
| North Carolina | Neuse R.               | 14         | 30         | 3         | 47         |
| North Carolina | New R.                 | 2          | 2          | 6         | 10         |
| North Carolina | Atlantic Ocean*        | 3          |            | 2         | 5          |
| North Carolina | Cape Fear R.           | 5          | 13         |           | 18         |
| South Carolina | Waccamaw R.            | 7          |            |           | 7          |
| South Carolina | Santee R.              | 2          | 4          |           | 6          |
| Georgia        | Altamaha R.            | 26         | 4          |           | 30         |
| Florida        | St. Johns R. (Wekiva)  | 1          | 2          |           | 3          |
|                |                        | <b>365</b> | <b>330</b> | <b>22</b> | <b>717</b> |

\*denotes non-river or sound sampling location

131

132 Figure 1. Map showing relative location of rivers included in this study as well as collection sites  
 133 of Hickory Shad. Revised after Melvin et al. [28].

134

135 Initially all specimens were frozen in water to minimize freezer burn and fin breakage,

136 and then eventually transferred to the Rulifson Lab at East Carolina University (ECU) for

137 examination. Once received or collected, fish were identified to species based on projection of

138 the lower jaw beyond the maxilla (as opposed to the American Shad, for which the lower jaw

139 inserts into a slot in the maxilla), weighed to the nearest 0.01 g, bagged individually without  
140 water, and given a unique identification number. After this step the fish were placed in freezers (-  
141 20°C or -0°C) on the ECU campus until analysis. Specimens were removed from the freezer and  
142 slowly allowed to thaw. A small tissue sample was taken from the dorsal fin, which was then  
143 placed in 95% ethanol (ETOH) and stored in a -80°C freezer for later genetic analysis.

144 A total of 17 morphometric measurements and 4 meristic characters (Table 2) were  
145 recorded generally following the methods outlined by Hubbs and Lagler [24]. All measurements  
146 were straight line distances from point to point on the left side of the body unless there was  
147 physical damage: standard length (SL) -- distance between most anterior portion of the head  
148 (lower jaw) to the last vertebrae; fork length (FL) -- the distance between the lower jaw to the  
149 fork of the caudal tail; total length (TL) -- the greatest distance between lower jaw and end of  
150 caudal fin when the caudal rays are pinched together; lower lip to nose (LLN) -- the distance of  
151 the projecting lower jaw to maxilla; snout to anal length (SAL) -- the distance between lower jaw  
152 and the anus; body depth (BD) -- greatest depth distance between anterior to dorsal fin and  
153 anterior of the ventral fin; head length (HL) -- the distance from lower jaw to the most distant  
154 point of the operculum (including membrane); eye length (EL) -- the greatest distance of the  
155 orbit; snout length (SNL) -- the distance from the most anterior point of the upper lip to the  
156 anterior margin of the orbit; head width (HW) -- the distance (width) across the head where the  
157 preopercle ends; interorbital width (IOW) -- distance between the eyes at the top of the cranium;  
158 maxillary length (ML) -- the distance from the tip of the upper jaw to the distal end of the  
159 maxillary; fin length dorsal base (FLD) -- the greatest distance of the structural base between the  
160 origin and insertion of the dorsal fin when the fin is erect; fin length anal base (FLA) -- the  
161 greatest distance of the structural base between the origin and insertion of the anal fin when the

162 fin is erect; longest ray dorsal fin (LRD) -- the distance from the structural base of the dorsal fin  
163 to the tip of the longest ray; longest ray pectoral fin (LRP) -- distance from the structural base of  
164 the pectoral fin to the tip of the longest ray; longest ray ventral (pelvic) fin (LRV) -- distance  
165 from the structural base of the ventral fin to the tip of the longest ray; longest ray anal fin (LRA)  
166 -- distance from the structural base of the anal fin to the tip of the longest ray when the fin is  
167 erect. A Hickory Shad illustration (Figure 2) depicts how most morphometric measurements  
168 were taken. IOW and HW were omitted on the illustration since they are width measurements  
169 and cannot be accurately depicted. The standard length, total length, and snout-to-anal length  
170 were measured to the nearest mm; all other measurements were taken by using Fisherbrand  
171 “Traceable” digital calipers (model number 06-644-16) to the nearest 0.01 mm.  
172

Table 2. Morphometric measurements and meristic counts analyzed, and acronyms used in this study.

| <b>Morphometric</b>           | <b>Acronym</b> | <b>Meristic</b>          | <b>Acronym</b> |
|-------------------------------|----------------|--------------------------|----------------|
| Standard Length               | SL             | Posterior Ventral Scutes | PVS            |
| Fork Length                   | FL             | Anterior Ventral Scutes  | AVS            |
| Total Length                  | TL             | Scale Rows               | SR             |
| Lower Lip-Nose                | LLN            | Longitudinal Scale Rows  | LSR            |
| Snout-to-Anal Length          | SAL            | Left Gill Raker Upper    | L-GRU          |
| Body Depth                    | BD             | Right Gill Raker Upper   | R-GRU          |
| Head Length                   | HL             | Left Gill Raker Lower    | L-GRL          |
| Eye Length                    | EL             | Right Gill Raker Lower   | R-GRL          |
| Snout Length                  | SNL            |                          |                |
| Head Width                    | HW             |                          |                |
| Interorbital Width            | IOW            |                          |                |
| Maxillary Length              | ML             |                          |                |
| Fin Length-Dorsal Base        | FLD            |                          |                |
| Fin Length-Anal Base          | FLA            |                          |                |
| Longest Ray Dorsal Fin        | LRD            |                          |                |
| Longest Ray Left Pectoral Fin | LRP            |                          |                |
| Longest Ray Left Ventral Fin  | LRV            |                          |                |
| Longest Ray Anal Fin          | LRA            |                          |                |



173 Figure 2. Hickory Shad illustration showing how morphometric measurements were taken.  
174 Reproduced from Whitehead [34].  
175

176 External meristic counts were taken on the left side of the body, unless there was damage:  
177 post ventral (pelvic) scutes (PVS) -- count of scutes from the end of the ventral fin to the anus;  
178 anterior ventral scutes (AVS) -- count of scutes from the beginning of the operculum to the  
179 ventral fin, including the scute straddling the ventral fins; scale rows (SR) -- count of scales  
180 along the lateral line, beginning at the upper angle of the operculum and terminating at the end of  
181 the hypural plate as determined with a crease in the caudal peduncle by folding the tail; and  
182 longitudinal scale rows (LSR) -- count of scales from the origin of the dorsal fin to the origin of  
183 the ventral fin. A random subset of specimens (n = 463) were analyzed for an additional four  
184 internal meristic counts, including the left and right gill rakers of the upper first arch (L-GRU, R-  
185 GRU) -- count of all gill rakers on the upper arch of first gill raker, not including the raker  
186 straddling the angle; and left and right gill rakers lower (L-GRL, R-GRL) -- count of all first arch  
187 gill rakers from the raker straddling the angle to the end, regardless of size.

188 External meristic characters including the scale rows between the upper angle of gill  
189 opening and base of caudal fin, longitudinal scale rows between origin of ventral fin and origin  
190 of dorsal fin, post-ventral scutes, and anterior-ventral scutes, were all counted from the freshly-  
191 thawed specimens.

192 To the best of our knowledge, there are no references in the literature detailing specific  
193 methods for counting scutes of clupeids. We chose to divide the scute count into two -- anterior  
194 and posterior -- of the ventral fin following Smith [17], though Nichols [26] and Melvin et al.  
195 [19] chose to count total scutes for American Shad. All scutes were counted, regardless of size,  
196 from where the ventral surface reaches the operculum posterior to the anus. Special care was

197 given to check for scutes obscured by the anus in all fish, specifically ripe females. Occasionally  
198 scales near the scutes had to be removed to fully expose all scutes, and then counts were obtained  
199 with the aid of a probe.

200 After external morphometric measurements and meristic counts were completed, fish  
201 were then dissected to remove the gonads, which were weighed to the nearest 0.01 g. Sex was  
202 determined for each specimen based on visual inspection of the gonad. Once features of each  
203 specimen were recorded, the data were compiled into one Microsoft Excel file for analyses.

204 Sample sizes for each state, watershed, and capture location were not uniform, nor were  
205 the number of males and females the same, due to the various collection methods and availability  
206 at the time of collection. In addition, the number of fish analyzed for each character was not  
207 always equal because some of the specimens were damaged necessitating the omission of one or  
208 more characters. Also the timing of the collection for each watershed was not standardized;  
209 spawning often started prior to the typical timeline for state agency spring sampling. The  
210 morphometric and meristic data presented here are from frozen and thawed -- not fresh --  
211 Hickory Shad and for purposes of the analyses we assumed that any bias caused by this process  
212 was equal across all specimens.

213

## 214 **Results**

215 Overall 717 Hickory Shad were analyzed for 17 morphometric measurements and four  
216 meristic characters from 23 different rivers and estuaries in Maryland, Delaware, Virginia, North  
217 Carolina, South Carolina, Georgia, and Florida following the methods outlined above. Results of  
218 descriptive statistics for all locations combined, separated by sex, for all measurements and  
219 counts are presented in Table 3. Results for each individual river and combined sex can be found

220 in Table 4. The random subset of specimens (n = 463) analyzed for four internal meristic gill  
 221 raker counts showed that Hickory Shad had between 8-11 rakers on L-GRU, 8-12 rakers on R-  
 222 GRU, and 19-22 rakers on both L-GRL and R-GRL.  
 223

Table 3. Descriptive data of morphometric and meristic characters for female and male specimens of Hickory Shad. See text for descriptions of each measurement or count. All measurements given in mm.

| Female    |                |        |       |        |     | Male      |                |        |       |        |     |
|-----------|----------------|--------|-------|--------|-----|-----------|----------------|--------|-------|--------|-----|
| Character | Range          | Mean   | SD    | % SL   | n   | Character | Range          | Mean   | SD    | % SL   | n   |
| SL        | 229 - 389      | 292.41 | 26.09 | -      | 365 | SL        | 206 - 344      | 264.62 | 20.63 | -      | 330 |
| FL        | 260 - 435      | 326.36 | 28.57 | 111.61 | 365 | FL        | 232 - 382      | 295.81 | 22.64 | 111.78 | 330 |
| TL        | 306 - 508      | 383.36 | 33.55 | 131.10 | 364 | TL        | 272 - 444      | 347.67 | 26.48 | 131.38 | 326 |
| LLN       | 2.44 - 7.90    | 3.93   | 0.73  | 1.34   | 365 | LLN       | 2.39 - 7.39    | 3.60   | 0.54  | 1.36   | 327 |
| SAL       | 172 - 289      | 218.99 | 20.26 | 74.89  | 364 | SAL       | 155 - 251      | 197.51 | 15.45 | 74.64  | 330 |
| BD        | 65.74 - 134.89 | 91.44  | 13.32 | 31.27  | 365 | BD        | 60.70 - 105.09 | 79.03  | 7.46  | 29.86  | 329 |
| HL        | 64.73 - 108.43 | 81.40  | 6.96  | 27.84  | 364 | HL        | 58.86 - 93.96  | 74.72  | 5.99  | 28.24  | 329 |
| EL        | 11.82 - 19.60  | 14.80  | 1.26  | 5.06   | 363 | EL        | 11.53 - 18.59  | 13.96  | 1.16  | 5.28   | 330 |
| SNL       | 15.93 - 27.84  | 20.75  | 1.84  | 7.10   | 363 | SNL       | 15.13 - 24.76  | 19.07  | 1.63  | 7.21   | 330 |
| HW        | 23.67 - 47.07  | 31.33  | 3.38  | 10.71  | 363 | HW        | 21.87 - 37.11  | 28.45  | 2.53  | 10.75  | 330 |
| IOW       | 10.38 - 20.90  | 14.52  | 1.77  | 4.96   | 364 | IOW       | 9.56 - 20.75   | 13.35  | 1.60  | 5.05   | 329 |
| ML        | 26.51 - 41.90  | 33.98  | 2.52  | 11.62  | 362 | ML        | 25.38 - 37.15  | 31.51  | 2.18  | 11.91  | 330 |
| FLD       | 33.97 - 63.41  | 63.41  | 4.80  | 21.69  | 365 | FLD       | 29.66 - 52.89  | 39.77  | 3.74  | 15.03  | 329 |
| FLA       | 37.80 - 68.23  | 49.00  | 4.65  | 16.76  | 363 | FLA       | 32.43 - 62.17  | 44.65  | 4.15  | 16.87  | 328 |
| LRD       | 29.88 - 55.12  | 39.77  | 3.99  | 13.60  | 364 | LRD       | 24.63 - 45.91  | 36.23  | 3.32  | 13.69  | 327 |
| LRP       | 43.10 - 77.09  | 55.42  | 5.32  | 18.95  | 363 | LRP       | 38.84 - 64.67  | 50.83  | 4.45  | 19.21  | 330 |
| LRV       | 23.76 - 46.09  | 34.90  | 3.29  | 11.93  | 362 | LRV       | 23.80 - 39.84  | 31.97  | 2.88  | 12.08  | 330 |
| LRA       | 14.61 - 26.59  | 19.74  | 2.33  | 6.75   | 360 | LRA       | 13.13 - 23.60  | 17.99  | 1.89  | 6.80   | 326 |
| SR        | 49 - 56        | 51.65  | 1.23  |        | 349 | SR        | 49 - 56        | 51.60  | 1.12  |        | 316 |
| LSR       | 15 - 19        | 17.81  | 0.55  |        | 339 | LSR       | 15 - 19        | 17.71  | 0.60  |        | 309 |
| PVS       | 14 - 18        | 15.86  | 0.75  |        | 361 | PVS       | 14 - 18        | 15.88  | 0.72  |        | 326 |
| AVS       | 17 - 23        | 21.35  | 0.84  |        | 363 | AVS       | 18 - 24        | 21.39  | 0.79  |        | 329 |

224  
 225  
 226  
 227  
 228  
 229  
 230

Table 4. Morphometric and meristic characters of Hickory Shad by river of collection (north to south). For each character; minimum - maximum, and mean values are presented.

| Character | Susquehanna   | Nanticoke     | Patapasco     | Rappahannock   | Appomattox    | James          | Meherrin | Nottaway       | Blackwater     | Roanoke        | Cashie         | Pungo         |
|-----------|---------------|---------------|---------------|----------------|---------------|----------------|----------|----------------|----------------|----------------|----------------|---------------|
| SL        | 234 - 318     | 257 - 325     | 249 - 309     | 257 - 336      | 234 - 300     | 221 - 331      | 265      | 224 - 306      | 233 - 334      | 221 - 334      | 234 - 326      | 234 - 268     |
| FL        | 277.27        | 293.64        | 271.06        | 294.34         | 272.24        | 272.91         | 272.91   | 270.72         | 273.08         | 273.77         | 286.06         | 250.33        |
|           | 260 - 353     | 285 - 361     | 281 - 347     | 288 - 373      | 263 - 336     | 250 - 369      | 302      | 252 - 341      | 266 - 375      | 249 - 369      | 266 - 368      | 264 - 302     |
|           | 306.64        | 325.50        | 304.44        | 327.83         | 304.54        | 305.17         | 302      | 303.72         | 306.84         | 305.86         | 320.59         | 282.67        |
| TL        | 302 - 414     | 336 - 421     | 328 - 403     | 338 440        | 310 - 395     | 294 - 431      | 353      | 298 - 401      | 311 - 441      | 292 - 425      | 315 - 433      | 312 - 354     |
|           | 359.00        | 382.14        | 356.62        | 385.11         | 357.34        | 357.89         | 353      | 357.56         | 361.44         | 359.44         | 376.73         | 332           |
| LLN       | 2.44 - 5.20   | 3.07 - 4.74   | 3.22 - 4.24   | 2.93 - 5.77    | 2.52 - 4.17   | 2.92 - 5.07    | 3.84     | 3.06 - 4.23    | 3.27 - 4.79    | 2.45 - 5.66    | 2.83 - 5.26    | 2.75 - 3.81   |
|           | 3.63          | 4.00          | 3.79          | 4.10           | 3.35          | 3.70           | 3.77     | 3.65           | 3.77           | 3.46           | 3.74           | 3.28          |
| SAL       | 171 - 234     | 186 - 243     | 188 - 235     | 190 - 255      | 175 - 227     | 167 - 254      | 202      | 169 - 228      | 171 - 256      | 165 - 249      | 176 - 251      | 176 - 198     |
|           | 203.82        | 216.36        | 204.32        | 218.98         | 202.38        | 204.23         | 202      | 204.22         | 205.96         | 204.14         | 216.56         | 187.33        |
| BD        | 63.79 - 94.86 | 71.55 - 97.23 | 70.19 - 93.96 | 75.72 - 114.74 | 65.74 - 97.68 | 66.19 - 111.24 | 77.60    | 66.58 - 101.63 | 69.49 - 101.80 | 61.29 - 101.53 | 67.12 - 112.66 | 69.22 - 77.97 |
|           | 81.93         | 83.29         | 81.41         | 91.34          | 80.71         | 84.00          | 77.94    | 84.23          | 84.19          | 80.74          | 87.4           | 74.32         |
| HL        | 65.45 - 90.54 | 72.56 - 89.36 | 70.13 - 86.79 | 73.19 - 94.29  | 67.35 - 86.34 | 64.42 - 91.91  | 77.94    | 65.27 - 83.91  | 66.72 - 92.33  | 62.15 - 87.45  | 68.15 - 90.30  | 67.93 - 75.88 |
|           | 76.79         | 81.43         | 76.24         | 82.60          | 77.41         | 77.03          | 77.94    | 76.66          | 76.69          | 76.09          | 80.04          | 71.69         |
| EL        | 12.61 - 17.27 | 13.46 - 17.25 | 12.75 - 15.80 | 13.34 - 17.54  | 12.31 - 15.41 | 11.59 - 17.74  | 13.97    | 13.11 - 15.31  | 13.84          | 12.12 - 16.34  | 12.97 - 15.93  | 12.97 - 14.53 |
|           | 15.03         | 15.46         | 13.76         | 15.60          | 14.21         | 14.14          | 13.97    | 14.19          | 13.84          | 14.22          | 14.46          | 13.77         |
| SNL       | 15.84 - 23.29 | 18.39 - 23.58 | 16.85 - 21.66 | 18.53 - 25.24  | 17.47 - 22.72 | 16.74 - 23.30  | 19.28    | 16.45 - 21.64  | 16.51 - 24.56  | 16.23 - 22.60  | 16.85 - 23.11  | 17.82 - 19.08 |
|           | 19.51         | 21.22         | 18.84         | 21.24          | 20.14         | 19.92          | 19.28    | 19.56          | 19.36          | 19.49          | 20.03          | 18.32         |
| HW        | 24.64 - 34.82 | 27.52 - 34.63 | 25.74 - 31.43 | 27.64 - 36.87  | 25.37 - 33.31 | 24.34 - 36.74  | 28.81    | 24.1 - 33.62   | 24.75 - 35.57  | 22.46 - 34.08  | 24.56 - 34.78  | 25.44 - 29.82 |
|           | 29.96         | 31.33         | 28.12         | 31.94          | 29.47         | 29.59          | 28.81    | 29.36          | 29.11          | 29.18          | 30.13          | 27.52         |
| IOW       | 12.06 - 18.16 | 12.87 - 16.93 | 12.42 - 15.79 | 12.62 - 18.27  | 12.24 - 16.32 | 10.59 - 17.96  | 13.08    | 10.62 - 14.96  | 10.31 - 14.94  | 10.28 - 16.64  | 10.84 - 15.37  | 10.93 - 14.28 |
|           | 14.98         | 15.24         | 13.85         | 15.06          | 14.09         | 13.49          | 13.08    | 12.91          | 12.58          | 13.54          | 13.34          | 12.45         |
| ML        | 26.57 - 37.15 | 30.79 - 37.94 | 29.36 - 35.82 | 29.84 - 38.15  | 29.04 - 35.73 | 27.02 - 38.54  | 32.79    | 29.53 - 35.75  | 28.78 - 37.48  | 26.1 - 36.92   | 29.36 - 37.59  | 28.70 - 30.97 |
|           | 31.95         | 34.12         | 31.73         | 34.13          | 32.42         | 32.27          | 32.79    | 32.63          | 32.49          | 32.02          | 33.46          | 30.15         |
| FLD       | 34.69 - 50.47 | 37.64 - 53.39 | 34.91 - 46.14 | 37.61 - 51.80  | 34.33 - 48.28 | 34.13 - 50.23  | 37.77    | 33.20 - 45.75  | 35.92 - 56.08  | 31.98 - 49.50  | 37.71 - 50.84  | 37.15 - 41.03 |
|           | 41.71         | 45.14         | 39.77         | 45.18          | 41.17         | 41.02          | 37.77    | 40.73          | 41.33          | 41.33          | 43.39          | 38.48         |
| FLA       | 38.03 - 57.49 | 44.93 - 55.16 | 35.26 - 52.49 | 43.73 - 57.52  | 38.93 - 51.78 | 37.22 - 53.10  | 43.73    | 37.09 - 50.92  | 39.43 - 53.58  | 37.20 - 54.42  | 40.05 - 55.36  | 41.30 - 48.69 |
|           | 47.47         | 49.76         | 44.82         | 49.65          | 46.33         | 45.81          | 43.73    | 44.71          | 45.78          | 46.29          | 47.57          | 44.28         |
| LRD       | 30.11 - 44.06 | 33.48 - 46.83 | 32.52 - 41.97 | 32.49 - 46.91  | 31.97 - 40.93 | 30.02 - 44.94  | 37.99    | 24.63 - 41.36  | 31.43 - 42.87  | 25.13 - 43.85  | 31.82 - 45.91  | 35.25 - 36.79 |
|           | 37.67         | 39.04         | 37.38         | 39.85          | 36.76         | 37.02          | 37.99    | 36.18          | 37.07          | 35.96          | 38.54          | 36.23         |
| LRP       | 41.66         | 48.74         | 46.33 - 57.53 | 48.69 - 64.12  | 44.77 - 57.83 | 41.35 - 64.92  | 52.07    | 44.70 - 58.36  | 45.27 - 64.07  | 41.38 - 59.11  | 47.17 - 62.22  | 48.18 - 51.50 |
|           | 51.47         | 53.90         | 51.25         | 55.77          | 52.31         | 52.16          | 52.07    | 52.54          | 52.98          | 52.14          | 54.5           | 49.36         |
| LRV       | 26.76 - 37.51 | 28.84 - 39.37 | 24.76 - 36.35 | 30.42 - 40.12  | 23.76 - 36.53 | 23.80 - 40.60  | 32.61    | 25.86 - 36.49  | 28.82 - 40.54  | 26.26 - 37.53  | 28.79 - 39.33  | 29.95 - 31.72 |
|           | 32.61         | 34.54         | 32.17         | 35.64          | 33.35         | 32.92          | 32.61    | 32.52          | 33.36          | 32.80          | 34.21          | 30.68         |
| LRA       | 14.53 - 22.32 | 16.36 - 21.59 | 13.84 - 20.94 | 16.35 - 23.90  | 14.61 - 23.35 | 14.44 - 23.99  | 19.16    | 15.76 - 22.11  | 15.25 - 23.07  | 14.60 - 23.53  | 16.18 - 23.60  | 17.34 - 18.26 |
|           | 18.55         | 18.99         | 17.44         | 19.63          | 17.98         | 18.38          | 19.16    | 18.80          | 18.93          | 18.27          | 19.66          | 17.79         |
| SR        | 51 - 55       | 52 - 55       | 49 - 52       | 50 - 56        | 50 - 53       | 50 - 56        | 51       | 50 - 52        | 50 - 53        | 51 - 55        | 51 - 54        | 50 - 52       |
|           | 53.00         | 53.14         | 50.73         | 52.51          | 51.60         | 51.83          | 51       | 51.33          | 51.56          | 52.11          | 51.65          | 51            |
| LSR       | 15 - 19       | 17 - 19       | 16 - 18       | 16 - 19        | 17 - 19       | 17 - 19        | 18       | 16 - 18        | 17 - 19        | 17 - 19        | 17 - 19        | 17            |
|           | 18.00         | 17.73         | 17.74         | 18.02          | 17.88         | 17.94          | 18       | 17.61          | 17.92          | 17.73          | 18             | 17            |
| PVS       | 15 - 17       | 15 - 18       | 15 - 17       | 15 - 17        | 15 - 17       | 14 - 17        | 15       | 14 - 17        | 15 - 17        | 15 - 17        | 15 - 18        | 15            |
|           | 15.71         | 16.05         | 16.08         | 15.81          | 15.59         | 15.83          | 15       | 15.83          | 15.96          | 16.14          | 16.33          | 15            |
| AVS       | 20 - 22       | 21 - 22       | 18 - 23       | 17 - 23        | 21 - 23       | 20 - 24        | 24       | 21 - 23        | 21 - 23        | 18 - 23        | 21 - 23        | 22            |
|           | 21.05         | 21.23         | 21.21         | 21.34          | 21.38         | 21.34          | 24       | 21.61          | 21.50          | 21.59          | 21.56          | 22            |
| n         | 22            | 22            | 50            | 47             | 50            | 65             | 1        | 18             | 25             | 44             | 34             | 3             |

231

232

Table 4 continued. Morphometric and meristic characters of Hickory Shad by river of collection (north to south). For each character, minimum - maximum, and mean values are presented.

| Character | Pamlico      | Pamlico Sound | Tar          | Neuse        | New         | Cap Fear     | Atlantic Ocean | Waccamaw      | Santee       | Altamaha     | Wekiva        | Grand Total  |
|-----------|--------------|---------------|--------------|--------------|-------------|--------------|----------------|---------------|--------------|--------------|---------------|--------------|
| SL        | 232-361      | 216-349       | 206-375      | 230-330      | 209-279     | 234-333      | 243-313        | 350-389       | 243-354      | 255-365      | 315-344       | 206-389      |
|           | 284.58       | 272.93        | 267.31       | 267.49       | 248.00      | 268.39       | 272.20         | 359.86        | 281.00       | 321.33       | 325.33        | 278.41       |
| FL        | 260-402      | 243-393       | 232-417      | 258-363      | 234-312     | 261-371      | 275-350        | 389-435       | 272-394      | 286-406      | 348-382       | 232-435      |
|           | 315.09       | 305.60        | 299.31       | 297.64       | 278.30      | 300.94       | 305.80         | 399.86        | 315.50       | 359.47       | 360.00        | 310.98       |
| TL        | 305-472      | 288-460       | 272-487      | 301-427      | 274-369     | 306-436      | 324-413        | 445-508       | 323-464      | 340-479      | 412-444       | 272-508      |
|           | 370.81       | 358.91        | 352.63       | 350.51       | 330.75      | 354.20       | 359.20         | 466.43        | 372.67       | 423.57       | 423.33        | 365.62       |
| LLN       | 2.64-7.89    | 2.85-4.83     | 2.47-5.55    | 2.7-5.34     | 2.64-3.65   | 2.87-4.58    | 3.23-3.73      | 3.97-6.03     | 2.39-3.66    | 3.26-4.88    | 4.03-4.55     | 2.39-7.89    |
|           | 4.48         | 3.61          | 3.73         | 3.70         | 3.15        | 3.65         | 3.52           | 4.47          | 2.96         | 3.89         | 4.30          | 3.76         |
| SAL       | 174-272      | 166-271       | 155-281      | 172-240      | 158-210     | 174-251      | 182-231        | 257-289       | 182-255      | 194-279      | 229-251       | 155-289      |
|           | 212.16       | 204.61        | 200.50       | 198.30       | 184.70      | 200.56       | 203.00         | 267.14        | 209.33       | 242.73       | 238.33        | 208.12       |
| BD        | 65.13-124.05 | 65.97-106.01  | 60.7-121.04  | 63.55-111.30 | 60.95-91.72 | 73.25-110.60 | 70.74-85.62    | 125.57-134.89 | 74.85-114.13 | 77.92-126.67 | 100.25-103.00 | 60.7-134.89  |
|           | 89.68        | 82.08         | 83.11        | 80.53        | 74.38       | 84.43        | 76.54          | 128.58        | 87.40        | 110.53       | 101.48        | 85.21        |
| HL        | 61.03-91.40  | 61.79-103.08  | 58.86-105.97 | 62.00-93.12  | 60.33-80.19 | 67.53-91.84  | 69.81-88.54    | 93.27-108.43  | 68.2-94.59   | 71.43-101.47 | 85.66-93.96   | 58.86-108.43 |
|           | 76.74        | 77.03         | 76.37        | 75.06        | 70.29       | 76.70        | 79.27          | 98.25         | 79.67        | 88.90        | 88.83         | 78.02        |
| EL        | 11.78-19.60  | 11.53-17.93   | 11.71-18.66  | 11.65-17.78  | 11.24-14.56 | 11.68-15.71  | 12.02-14.86    | 16.32-18.51   | 12.50-17.39  | 12.90-17.73  | 15.57-17.29   | 11.24-19.60  |
|           | 14.62        | 13.93         | 14.11        | 14.25        | 12.95       | 13.35        | 13.56          | 17.17         | 14.68        | 15.56        | 16.37         | 14.38        |
| SNL       | 16.58-27.03  | 15.13-27.84   | 15.25-25.70  | 16.60-22.91  | 15.47-20.37 | 16.46-22.88  | 15.93-22.08    | 23.31-26.81   | 16.70-24.30  | 17.92-25.05  | 22.06-24.76   | 15.13-27.84  |
|           | 20.59        | 19.27         | 19.59        | 19.38        | 17.52       | 18.59        | 19.40          | 24.69         | 20.15        | 21.59        | 23.03         | 19.90        |
| HW        | 24.91-47.07  | 22.72-39.21   | 21.87-42.18  | 23.88-35.00  | 21.51-30.44 | 23.75-34.77  | 24.22-31.63    | 39.06-42.41   | 27.37-38.21  | 28.09-37.84  | 34.63-37.11   | 21.51-47.07  |
|           | 32.09        | 28.21         | 29.05        | 28.75        | 25.88       | 28.32        | 28.13          | 40.62         | 31.30        | 34.10        | 35.49         | 29.86        |
| IOW       | 10.84-20.90  | 9.59-20.42    | 9.56-18.25   | 11.00-17.11  | 10.49-14.32 | 11.29-16.73  | 10.93-15.89    | 17.09-19.73   | 12.83-17.51  | 13.42-18.29  | 15.69-19.44   | 9.56-20.90   |
|           | 15.05        | 13.12         | 12.94        | 13.50        | 12.24       | 13.52        | 13.33          | 18.09         | 14.69        | 16.16        | 17.28         | 13.92        |
| ML        | 27.00-40.51  | 26.51-41.23   | 25.38-41.78  | 26.92-36.81  | 26.05-33.92 | 27.86-37.37  | 28.99-35.74    | 38.93-41.90   | 29.55-38.37  | 30.43-39.79  | 35.43-37.15   | 25.38-41.90  |
|           | 33.28        | 32.13         | 32.24        | 31.66        | 29.95       | 31.91        | 32.03          | 39.78         | 33.18        | 36.33        | 36.09         | 32.72        |
| FLD       | 34.16-55.88  | 30.34-52.33   | 29.95-61.11  | 29.66-50.86  | 29.70-42.66 | 33.97-47.30  | 36.89-48.09    | 54.32-63.41   | 39.06-51.82  | 38.97-57.88  | 43.56-52.89   | 29.66-63.41  |
|           | 42.98        | 41.08         | 40.03        | 39.39        | 37.15       | 40.39        | 41.46          | 56.55         | 43.34        | 49.90        | 49.47         | 42.00        |
| FLA       | 35.15-60.78  | 35.33-56.26   | 32.43-62.29  | 36.44-53.82  | 36.39-50.97 | 39.33-56.15  | 41.25-54.32    | 55.23-68.23   | 40.21-63.03  | 37.50-64.81  | 56.84-62.17   | 32.43-68.23  |
|           | 47.42        | 46.10         | 44.67        | 44.79        | 43.13       | 46.25        | 46.71          | 60.17         | 48.14        | 53.90        | 58.98         | 46.85        |
| LRL       | 31.67-55.12  | 29.88-47.24   | 27.09-48.73  | 28.43-45.81  | 25.49-39.65 | 29.57-42.92  | 32.58-41.35    | 44.32-53.94   | 33.18-50.27  | 34.85-50.25  | 44.92-45.82   | 24.63-55.12  |
|           | 40.38        | 37.10         | 37.22        | 37.08        | 34.72       | 37.38        | 36.74          | 47.71         | 39.95        | 43.37        | 45.32         | 38.01        |
| LRLP      | 38.83-69.67  | 43.12-67.21   | 39.22-70.87  | 41.60-64.11  | 39.93-57.00 | 45.11-62.10  | 45.65-59.48    | 63.38-77.09   | 46.59-72.86  | 49.15-68.44  | 60.08-64.67   | 38.83-77.09  |
|           | 53.29        | 52.15         | 51.90        | 50.89        | 47.95       | 52.76        | 51.88          | 69.32         | 56.07        | 61.49        | 61.75         | 53.09        |
| LRLV      | 26.67-43.48  | 25.12-43.07   | 24.49-43.28  | 25.75-40.06  | 23.99-33.80 | 26.78-38.25  | 29.10-38.04    | 39.25-46.09   | 29.76-41.98  | 24.87-43.45  | 36.84-39.84   | 23.76-46.09  |
|           | 33.55        | 32.59         | 32.44        | 32.28        | 29.71       | 33.03        | 32.51          | 42.80         | 34.64        | 38.01        | 37.93         | 33.40        |
| LRA       | 13.13-26.34  | 14.16-25.17   | 13.79-25.80  | 13.99-22.77  | 14.08-19.09 | 14.30-21.19  | 15.88-19.85    | 23.49-26.59   | 15.11-24.14  | 16.79-26.33  | 21.40-22.86   | 13.13-26.59  |
|           | 19.65        | 18.42         | 19.06        | 18.48        | 16.89       | 18.30        | 18.16          | 24.81         | 18.76        | 21.85        | 22.16         | 18.85        |
| SR        | 49-55        | 50-55         | 50-54        | 50-54        | 50-52       | 50-51        | 50-51          | 51-53         | 51-52        | 49-52        | 52            | 49-56        |
|           | 52.03        | 51.34         | 51.40        | 51.81        | 50.89       | 50.78        | 50.40          | 51.43         | 51.17        | 50.23        | 52.00         | 51.62        |
| LSR       | 15-19        | 16-18         | 17-18        | 16-19        | 18          | 18           | 17-18          | 16-19         | 17-18        | 17-18        | 16-19         | 15-19        |
|           | 17.51        | 17.63         | 17.79        | 17.36        | 18.00       | 18.00        | 17.60          | 17.86         | 17.67        | 17.67        | 17.33         | 17.77        |
| PPS       | 14-18        | 15-17         | 14-17        | 14-17        | 14-17       | 14-17        | 15-16          | 14-16         | 16           | 14-17        | 15-16         | 14-18        |
|           | 16.13        | 15.82         | 15.72        | 15.96        | 15.33       | 15.39        | 15.40          | 15.29         | 16.00        | 15.50        | 15.67         | 15.87        |
| APS       | 17-23        | 20-23         | 20-23        | 19-23        | 21-22       | 21-22        | 21-22          | 21-22         | 21-22        | 20-22        | 21-23         | 17-24        |
|           | 20.63        | 21.42         | 21.40        | 21.60        | 21.30       | 21.72        | 21.40          | 21.43         | 21.33        | 21.33        | 22.33         | 21.37        |
| n         | 64           | 94            | 52           | 47           | 10          | 18           | 5              | 7             | 6            | 30           | 3             | 717          |

233

234

235 A basic review of the morphometric and meristic data showed sexual difference in many  
236 characters, namely morphometric measurements. All morphometric characters showed sexual  
237 difference in character means, yet some character differences were more substantial. For  
238 example, the mean measurements (mm) of BD (Female: 91.44, Male: 79.03), FLD (Female:  
239 63.41, Male: 39.77), SAL (Female: 218.99, Male: 197.51), and HL (Female: 81.40, Male: 74.72)  
240 were largely different between sexes. For meristic counts on SR, LSR, PVS, and AVS there was  
241 no observed difference between sexes and so the averages between males and females were  
242 similar. Of the four counts, the largest difference in the averages was found for the count of LSR  
243 where the averages were 17.81 and 17.71 for females and males, respectively. Due to the  
244 differences in some characters (i.e., morphometric) by sex, it was necessary to divide the  
245 morphometric and meristic data for males and females for accurate description and analysis.

246

#### 247 Specimen Size

248 All Hickory Shad collected and included in this study were adults (sexually mature)  
249 participating in the annual spawning run and all morphometric and meristic data reported are for  
250 adult fish. Male specimens from locations combined ranged from 206 to 344 mm SL with a  
251 mean  $\pm$  SD of  $264.42 \pm 20.52$  mm. Female specimens ranged from 229 to 389 mm with a mean  
252 of  $289.72 \pm 24.71$  mm. Sizes for sexes and locations combined ranged from 206 to 389 mm SL  
253 with a mean of  $276.53 \pm 26.31$  mm. The linear relationships between FL and TL, and FL and SL,  
254 were:

255 
$$TL = 1.169*FL + 1.660 \text{ (n=705, } r^2=0.995\text{); and}$$

256 
$$SL = 0.909*FL - 4.274 \text{ (n=717, } r^2=0.992\text{)}.$$

257           The largest Hickory Shad were from the Waccamaw River, SC and the mean  $\pm$  SD was  
258   359.86  $\pm$  13.92 mm SL with a range between 350 and 389 mm SL; average weight was 1281.13  
259    $\pm$  95.46 g and all seven specimens from this river were female. On average the smallest Hickory  
260   Shad were collected from the New River, NC with a mean  $\pm$  SD of 248  $\pm$  24.92 mm SL and a  
261   range of 209 to 279 mm SL. However, the smallest Hickory Shad collected in this study (206  
262   mm SL) was a male from the Tar River, NC. Specimen total body weight (n = 695) with sexes  
263   and locations combined ranged from 206.03 to 1488.28 g with a mean  $\pm$  SD of 501.34  $\pm$  187.52  
264   g, and gonad weights (n = 691) from 0.38 to 266.03 g with a mean of 49.88  $\pm$  45.78 g.

265

266   Sex

267           Overall, females were larger than males of similar SL. The smallest male weighed 206.03  
268   g and largest weighed 866.50 g. The smallest female weighed 242.40 g and largest 1488.28 g.  
269   Gonads for females weighed from 0.38 to 266.03 g with a mean  $\pm$  SD of 74.43  $\pm$  51.15 g.  
270   Gonads for males weighed from 0.90 to 62.53 g with a mean of 22.86  $\pm$  11.53 g. Variation in  
271   size and weight of female gonads were largely dependent on spawning status. Some gonad  
272   specimens had deteriorated so gonad weight measurements (n = 4) and sex determination (n =  
273   22) were not possible. In addition, the sexing of some specimens was omitted on the data sheet  
274   during the examination process.

275

276   Missing data

277           Some of the 717 Hickory Shad could not be analyzed for the entire suite of 17  
278   morphometric and four meristic characters due to specimen damage. This resulted in 146 missing  
279   values across all morphometric and meristic characters. Missing value analysis was performed in

280 SPSS version 24 [27] and the meristic character LSR had the most missing data (7.7%). Of the  
281 remaining characters only SR, LRA, and PVS had more than 1.0% missing: 4.3, 1.3, and 1.1%,  
282 respectively. Values for count and percent missing of each character are reported in [Table 5](#).  
283  
284  
285

Table 5. Missing value analysis of 18 morphometric and four meristic characters of Hickory Shad.

| Character | N   | Mean   | Std. Deviation | Missing |         |
|-----------|-----|--------|----------------|---------|---------|
|           |     |        |                | Count   | Percent |
| SL        | 717 | 278.41 | 27.69          | 0       | 0.0     |
| FL        | 717 | 5.73   | 0.01           | 0       | 0.0     |
| TL        | 710 | 5.89   | 0.01           | 7       | 1.0     |
| LLN       | 714 | 1.31   | 0.14           | 3       | 0.4     |
| SAL       | 716 | 5.33   | 0.02           | 1       | 0.1     |
| BD        | 716 | 4.43   | 0.09           | 1       | 0.1     |
| HL        | 715 | 4.35   | 0.03           | 2       | 0.3     |
| EL        | 714 | 2.66   | 0.05           | 3       | 0.4     |
| SNL       | 715 | 2.98   | 0.04           | 2       | 0.3     |
| HW        | 715 | 3.39   | 0.04           | 2       | 0.3     |
| IOW       | 715 | 2.62   | 0.07           | 2       | 0.3     |
| ML        | 714 | 3.48   | 0.03           | 3       | 0.4     |
| FLD       | 716 | 3.73   | 0.05           | 1       | 0.1     |
| FLA       | 713 | 3.84   | 0.05           | 4       | 0.6     |
| LRD       | 713 | 3.63   | 0.10           | 4       | 0.6     |
| LRP       | 715 | 3.97   | 0.04           | 2       | 0.3     |
| LRV       | 714 | 3.50   | 0.04           | 3       | 0.4     |
| LRA       | 708 | 2.93   | 0.07           | 9       | 1.3     |
| SR        | 686 | 51.62  | 1.17           | 31      | 4.3     |
| LSR       | 662 | 17.77  | 0.58           | 55      | 7.7     |
| PVS       | 709 | 15.86  | 0.73           | 8       | 1.1     |
| AVS       | 714 | 21.36  | 0.81           | 3       | 0.4     |

286

287



288 Comparison between Hickory Shad and other Clupeids

289 Morphometric and meristic results of this study were compared to available literature  
290 values for morphologically similar clupeids, including the American Shad, Alewife, and  
291 Blueback Herring (Table 6). Characters mentioned here represent the clearest difference between  
292 species: Hickory Shad have a larger body depth as a percent of total length (22.31-26.55)  
293 compared to American Shad (17.2-19.4) and Alewife (17.8-21.7), but body depth is similar to  
294 that of Blueback Herring (22.1-25.2). The upper portions of the variable ranges for Hickory Shad  
295 scute and scale row counts (PVS, AVS, and SR) were less than that for American Shad, but LSR  
296 was greater for Hickory Shad. This is not surprising since the body depth as a percent of total  
297 length was greatest for Hickory Shad, and the LSR character is counted along the depth of the  
298 body. The range of interorbital width (IOW) as a percent of head length for Hickory Shad  
299 (16.24-19.28) was most similar to Alewife (15.7-21.6); the range for American Shad (18.6-21.6)  
300 was higher than for Hickory Shad but within the range for Alewife. Overall, Blueback Herring  
301 interorbital width as a percent of head length (21.1-26.4) is the largest. As for eye length as a  
302 percent of head length, the Hickory Shad has the smallest range (18.08-19.10), which is much  
303 less than that of American Shad (27.3-32.0), Blueback Herring (23.4-30.0) and Alewife (26.9-  
304 35.7).

305

Table 6. Comparison of morphometric and meristic characters for Hickory Shad, American Shad, Alewife, and Blueback Herring. Range given for each, if available; usual values reported in literature in parentheses.

| Character | Hickory Shad | American Shad                    | Blueback Herring       | Alewife                                               |
|-----------|--------------|----------------------------------|------------------------|-------------------------------------------------------|
| BD % TL   | 22.31-26.55  | 17.2-19.4 <sup>a</sup>           | 22.1-25.2 <sup>a</sup> | 17.8-21.7 <sup>a</sup>                                |
| HL % TL   | 21.34-21.64  | 22.7-24.0 <sup>a</sup>           | 18.5-20.6 <sup>a</sup> | 20.3-23.7 <sup>a</sup>                                |
| EL % HL   | 18.08-19.10  | 27.3-32.0 <sup>a</sup>           | 22.0-26.4 <sup>a</sup> | 26.1-32.0 <sup>a</sup>                                |
| SNL % HL  | 25.68-25.71  | 26.9-32.0 <sup>a</sup>           | 23.4-30.0 <sup>a</sup> | 26.9-35.7 <sup>a</sup>                                |
| IOW % HL  | 16.24-19.28  | 18.6-21.6 <sup>a</sup>           | 21.1-26.4 <sup>a</sup> | 15.7-21.6 <sup>a</sup>                                |
| FLA % TL  | 11.92-13.43  |                                  |                        | 10.3-12.0 <sup>a</sup>                                |
| PVS       | 14-18        | 12 <sup>b</sup> -19 <sup>a</sup> | 12-16 <sup>a</sup>     | 12 <sup>d</sup> -17 <sup>f</sup> (14-15) <sup>a</sup> |
| AVS       | 17-24        | 19-25 <sup>b</sup>               | 18-21 <sup>d</sup>     | 17-21 (19-20) <sup>a</sup>                            |
| SR        | 49-56        | 52-64 <sup>c</sup>               | 46-54 <sup>d</sup>     | 42 <sup>d</sup> -54 <sup>g</sup>                      |
| LSR       | 15-19        | 15-16 <sup>d</sup>               | 13-14 <sup>e</sup>     | 14 <sup>d</sup>                                       |

<sup>a</sup> Scott and Crossman 1973, <sup>b</sup> Hill 1956, <sup>c</sup> Walburg and Nichols 1967, <sup>d</sup> Hildebrand 1963

<sup>e</sup> Thomson et al 197, <sup>f</sup> Leim and Scott 1966, <sup>g</sup> Miller 1957

306

## 307 Discussion

308 It is often difficult to discern the causes of morphological and meristic variations between  
309 fish populations [22] though it is assumed they might be related to genetic differences or linked  
310 to phenotypic plasticity resulting from non-homogeneous environmental factors in each river  
311 [19]. However, reasons why there are variations in meristic and morphological characters were  
312 not an objective of our study.

313 Instead, our study provides foundational information on the morphometric and meristic  
314 variation of Hickory Shad across a large portion of the species range. To complement this study,  
315 further research is needed to investigate these characters of Hickory Shad from more southern  
316 rivers in Georgia and Florida. This would allow comparison of morphometric and meristic  
317 variation across the entire species range and determine if greater geographic distance  
318 corresponds to larger variation. It is more likely that adjacent rivers or watersheds share common  
319 environmental characteristics compared to rivers separated by large distances, possibly leading to

320 greater variation in morphometrics and meristics. For instance, we were able to obtain 22  
321 samples from a small tributary of the Susquehanna, River Maryland at the mouth of Deer Creek  
322 (39.613358 N, -76.149024 W), which is near the northern end of the assumed Hickory Shad  
323 spawning range. Unfortunately, we were unable to obtain large sample sizes from the  
324 southernmost Hickory Shad spawning population of the St. Johns River, Florida, though we did  
325 obtain three specimens from the Wekiva River, a tributary of the St. Johns (28.8728226 N, -  
326 81.3689402 W). The Wekiva River, Florida, and Deer Creek, Maryland, are separated by  
327 roughly 1280 Km.

328         One limitation of this study is that equal sample sizes for each state and watershed could  
329 not be collected. Attempts were made to have between 25-50 fish per watershed and a 50:50 sex  
330 ratio, but as with most all fisheries work, success in sampling is often not reliable. Multiple  
331 factors influenced our ability to collect more samples, including early Hickory Shad spawning  
332 runs in some locations, foul weather, low river water levels prohibiting boat access, severe long-  
333 term flooding, and expense of traveling to distant locations. It is possible that the morphometric  
334 and meristic values presented here for rivers with small samples sizes may not accurately capture  
335 the true natural variation of the characters in those populations. Additionally, the timing of  
336 specimen collection was not standardized and often started after the spawning run had fully  
337 begun, which could have potentially affected this study (i.e., size or sex distributions). Overall,  
338 slightly more female specimens (n = 365) were collected than male (n = 330) representing 52.5%  
339 and 47.5% of the specimens included in this study, respectively. The difference in the number of  
340 males and females could be a product of gear bias and not necessarily representative of the  
341 natural populations. For instance, gill nets used to collect some specimens in this study are more  
342 selective for larger female Hickory Shad than smaller males. Melvin et al. [19] studying

343 American Shad also found gill nets to be selective for larger females. Furthermore, we  
344 experienced a willingness of sport fishers to provide specimens for our study, but reluctance to  
345 provide females since most fishers wanted the roe for bait or for personal consumption.

346

#### 347 Sexual Differences

348 Differences observed in the averages of morphometric characters when compared by sex  
349 was not a surprising result and is relatively common in fish, though it has never been explicitly  
350 described for Hickory Shad. This has significant implications and suggests studies on Hickory  
351 Shad must be separated by sex and analyzed in that manner since there is substantial difference  
352 between male and female specimens. Melvin et al. [19] came to similar conclusions for  
353 morphometric and meristic characters of American Shad and so males and females were  
354 analyzed separately.

355

#### 356 Specimen Size

357 It is important to note that the morphometric measurements presented in this study are of  
358 frozen and not freshly caught Hickory Shad. It is possible that the freezing and thawing process  
359 may slightly alter the shape and or size of some morphometric characters. Melvin et al. [28]  
360 reported a significant difference ( $P < 0.01$ ) between length measurements of live American Shad  
361 in the field compared to measurements of dead specimens in the laboratory. In the event  
362 American Shad were frozen prior to measurement, the length was multiplied by 1.021 to better  
363 approximate fresh length [28]. Though fish samples are often frozen by biologists for later  
364 processing, future studies should investigate if there is a significant difference between  
365 morphometric measurements for fresh versus frozen Hickory Shad and, if so, which

366 measurements are the most robust to the freezing and thawing process. Cronin-Fine et al. [29]  
367 found 10 geometric morphometric measurements of Alewife that did not have a significant  
368 difference between fresh and frozen specimens. Generally for meristics, the act of freezing and  
369 thawing is not problematic since it does not change the counts of meristic features.

370         The freezing and thawing process could also have biased the weight of the fish, but  
371 similar to morphometric measurements, the bias is shared across all individuals. Also, gonad  
372 weight can be extremely dependent on spawning status (pre or post-spawn), especially for  
373 females. Spent females weigh less than ripe and ready-to-spawn individuals, but unfortunately  
374 spawning status was not recorded during dissections. There were a few instances of gonads that  
375 were unable to be weighed (or sexed) because they were no longer intact or starting to  
376 decompose. This was likely a result of freezer storage for an extended length of time, multiple  
377 freezing and thawing events, or the length of time from collection till initial freezing. This was  
378 not a serious problem; 26 specimens exhibited deterioration and this state was relatively random  
379 across rivers. Also, it was likely that some of the individuals not sexed was caused by human  
380 error instead of relating to the state of the gonads.

381         The regression equations for relationships between Hickory Shad FL and TL, and  
382 between FL and SL, provide a means for converting between the various measurements of fish  
383 size. This could be useful for biologists or fishery managers to accurately estimate one length  
384 from another in the instance that only one of the measurements was recorded.

385

#### 386 Missing Data

387         Though not a frequent problem in this study, missing data are quite common in  
388 morphometric (and meristic) studies [30]. Some of the specimens could not be analyzed for the

389 entire 17 morphometric and four meristic characters due to damage including broken or missing  
390 fins, missing scales, and wounds from predation or gear-related injury. Missing scales are not  
391 surprising, since the Hickory Shad as well as other clupeids are very susceptible to shedding  
392 scales. The frequency of missing values for all characters can be found in Table 5. In our study  
393 no imputation procedures (i.e., replacement or regression-based approaches) were used to  
394 estimate missing data; instead these values were simply omitted.

395

396 Comparison between Hickory Shad and other Clupeids

397 Most of the morphometric and meristic characters investigated in this study do not serve  
398 to easily differentiate Hickory Shad from American Shad, Alewife, or Blueback Herring though  
399 careful examination of certain characters can help narrow down the species. One common and  
400 definitive way to distinguish Hickory Shad from the other species is by gill raker counts. Though  
401 not directly incorporated into this study, a random subset of Hickory Shad specimens was  
402 analyzed for gill raker counts. It was determined that Hickory Shad had between 19-22 gill  
403 rakers on the lower limb of the first arch (n=463), which is considerably less than the other  
404 anadromous *Alosa* species. American Shad typically have 59-76 lower gill rakers on the first  
405 arch, Blueback Herring 41-52, and Alewife 38-46, all of which are higher counts [31] due to  
406 their diet being different than Hickory Shad, which are more piscivorous [32].

407

408 **Conclusion**

409 Mansueti [7] described Hickory Shad as “The most enigmatic of all estuarine clupeoids”  
410 and the intent of our study was to expand the existing taxonomic knowledge of the species.  
411 Mitchill [2] used six meristic characters in describing the species: branchiostegal, pectoral,

412 ventral, anal, dorsal, and caudal rays. These six characters were not included in this study  
413 because the methods Mitchill used to count them were not available and therefore no direct  
414 comparison was possible. Instead, 17 morphometric measurements and four meristic counts not  
415 included in the original description of the species were utilized. The information about the  
416 anatomical characteristics presented herein are lacking in the literature, though they are well  
417 known for most other anadromous fish species. These additional morphological and meristic  
418 characters may prove valuable for separating regions or watersheds in future studies. Geometric  
419 morphometric analysis may be another viable option to investigate body shape variability. In  
420 addition, there still remain many unanswered questions regarding Hickory Shad life history,  
421 biology, and stock status that should be addressed so that the species can be properly managed  
422 and all spawning populations sustained. Furthermore, the intraspecific variation of Hickory Shad  
423 described here could be used to discriminate the different populations using multivariate analysis  
424 [33].

425

## 426 **Acknowledgments**

427 We thank the North Carolina Wildlife Resources Commission for providing funding through the  
428 Sport Fish Restoration Act. We also thank the many agencies that collected samples: North  
429 Carolina Wildlife Resources Commission, North Carolina Division of Marine Fisheries, South  
430 Carolina Department of Natural Resources, Florida Fish and Wildlife Conservation Commission,  
431 Virginia Department of Game and Inland Fisheries, Maryland Department of Natural Resources,  
432 Georgia Department of Natural Resources, Delaware Division of Fish and Wildlife, and the  
433 Smithsonian Environmental Research Center. The Department of Biology at East Carolina  
434 University provided logistic support, travel, and field and laboratory equipment.

435 **Author Contributions**

436

437 **Conceptualization:** Roger A. Rulifson

438 **Data curation:** Roger A. Rulifson

439 **Formal analysis:** Jordan P. Smith; Michael W. Brewer

440 **Funding acquisition:** Roger A. Rulifson.

441 **Investigation:** Jordan P. Smith

442 **Methodology:** Jordan P. Smith, Michael W. Brewer, Roger A. Rulifson

443 **Project administration:** Roger A. Rulifson.

444 **Resources:** Roger A. Rulifson.

445 **Software:** Jordan P. Smith

446 **Supervision:** Roger A. Rulifson, Michael W. Brewer

447 **Visualization:** Jordan P. Smith

448 **Writing - original draft:** Jordan P. Smith

449 **Writing - review & editing:** Roger A. Rulifson, Michael W. Brewer, Jordan P. Smith

450

451 **References**

452

- 453 1. Gill TN. Report in part of Samuel L. Mitchill on the fishes of New York. Washington, D. C.  
454 1898.
- 455 2. Mitchill SL. Report, in part, on the fishes of New-York. Trans. Lit. Phil. Soc. NY. 1814:450.
- 456 3. Regan CT. XXVI.—A revision of the Clupeoid fishes of the genera *Pomolobus*, *Brevoortia*  
457 and *Dorosoma*, and their allies. Annals and Magazine of Natural History. 1917; 19:112, 297-  
458 316; DOI: 10.1080/00222931709486942.
- 459 4. Bowen, BR, Kreiser BR, Mickle PF, Schaefer JF, Adams SB. Phylogenetic relationships  
460 among North American *Alosa* species (Clupeidae). J Fish Biol. 2008; 72:1188-1201.
- 461 5. Bailey RM, Winn HE, Smith CL. Fishes from the Escambia River, Alabama and Florida,  
462 with ecologic and taxonomic notes. Proc Acad Nat Sci Philadelphia. 1954; 56:109-164.
- 463 6. Svetovidov AN. Systematics of North American anadromous Clupeoid fishes of the genera  
464 *Alosa*, *Caspialosa*, and *Pomolobus*. Copeia 1964:118-130.
- 465 7. Mansueti RJ. Eggs, larvae, and young of the Hickory Shad, *Alosa mediocris*, with comments  
466 on its ecology in the estuary. Ches Sci. 1962; 3:1733-205.



- 467 8. Perillo JA, Butler LH. 2009. Evaluating the use of Fairmount Dam fish passage facility with  
468 application to anadromous fish restoration in the Schuylkill River, Pennsylvania. *J Penn*  
469 *Acad Sci.* 2009; 83(1):24-33.
- 470 9. Harris, JE, McBride RS, Williams RO. Life history of Hickory Shad in the St. Johns River,  
471 Florida. *Trans Am Fish Soc.* 2007; 136(6):1463-1471.
- 472 10. Hildebrand SF, Schroeder WC. Fishes of Chesapeake Bay. *US Bur Fish Bull.* 1928; Vol 18  
473 Part 1:388 p.
- 474 11. Rulifson RA. 1994. Status of anadromous *Alosa* along the east coast of North America. In:  
475 Cooper JE, Eades RT, Klauda RJ, Loesch JG, editors. *Anadromous Alosa Symposium.*  
476 *Tidewater Chapter, American Fisheries Society, Bethesda, MD.* 1994:134-158.
12. Murauskas JG, Rulifson RA. 2011. Reproductive development and related observations  
during the spawning migration of hickory shad, *Alosa mediocris*. *Trans Am Fish Soc* 2011;  
140(1):1035–1048.
- 477 13. Uhler PR, Lugger O. Report of the Commissioners of Fisheries of Maryland. Annapolis, MD.  
478 1876:159-160.
- 479 14. Jordan DS, Evermann BW. 1896. The Fishes of North and Middle America, Smithsonian  
480 Institution, US Nat. Mus., Washington. 1896; 1:425-426.
- 481 15. Smith HM. The fishes of North Carolina. EM Uzzell & Company. 1907; Vol 2.
- 482 16. Jones PW, Martin FD, Hardy JD, Jr. Development of fishes of the Mid-Atlantic Bight: an  
483 atlas of egg, larval and juvenile stages: Vol 1 Acipenseridae through Ictaluridae. *US Fish*  
484 *Wildl Serv.* 1978.
- 485 17. Smith CL. The inland fishes of New York State. NY State Dep Envir Cons, Albany, NY.  
486 1985.
- 487 18. Menhinick EF. Freshwater fishes of North Carolina. NC Wildlife Resources Commission,  
488 Raleigh. 1991.
- 489 19. Melvin GD, Dadswell MJ, McKenzie JA. Usefulness of meristic and morphometric  
490 characters in discriminating populations of American shad (*Alosa sapidissima*)  
491 (Ostreichthyes:Clupeidae) inhabiting a marine environment. *Can. J. Fish. Aquat. Sci.* 1992;  
492 49:266-280.
- 493 20. Rulifson RA, McKenna SA, Gallagher M. Tagging studies of striped bass and river herring  
494 in upper Bay of Fundy, Nova Scotia. *NC Dep. Nat. Res. Comm. Develop., Div. Mar. Fish.,*  
495 *Morehead City.* 1987.
- 496 21. Swain DP, Foote CJ. Stocks and chameleons: the use of phenotypic variation in stock  
497 identification. *Fish. Res.* 1999; 43:113-128.
- 498 22. Cadrin SX. Advances in morphometric identification of fishery stocks. *Rev Fish Biol*  
499 *Fisheries.* 2000; 10:91-112.
- 500 23. Siddik MAB, Hanif MA, Chaklader MR, Nahar A, Fotedar R. A multivariate morphometric  
501 investigation to delineate stock structure of gangetic whiting, *Sillaginopsis panijus*  
502 (Teleostei: Sillaginidae). *SpringerPlus.* 2016;5:520.
- 503 24. Hubbs CL, Lagler KF. Fishes of the Great Lakes Region. Ann Arbor: The University of  
504 Michigan Press. 1947.
- 505 25. Smith CM, Rulifson RA. Overlapping habitat use of multiple anadromous fish species in a  
506 restricted coastal watershed. *Trans Am Fish Soc.* 2015; 144(6):1173-1183.
- 507 26. Nichols PR. Comparative study of juvenile American Shad populations by fin ray and scute  
508 counts. *US Department of Interior, US Fish Wildl Serv, Bur Comm Fish Spec Scient Rep-*  
509 *Fish. No. 525.* 1966.

- 510 27. Melvin GD, Dadswell MJ, Martin JD. Impact of lowhead hydroelectric tidal power  
511 development on fisheries: 1, a pre-operation study of the spawning population of American  
512 Shad, *Alosa sapidissima* (Pisces: Clupeidae), in the Annapolis River, Nova Scotia, Canada.  
513 Dep. Fish. Oceans, Fish. Res. Branch, Fish. Envir. Sci. Div., Biological Station. 1985.
- 514 28. IBM Corporation. SPSS Statistics for Windows, Version 24.0. Armonk (NY): IBM; 2016.
- 515 29. Cronin-Fine L, Stockwell JD, Whitener ZT, Labbe EM, Willis TV, Wilson KA. Application  
516 of morphometric analysis to identify alewife stock structure in the Gulf of Maine. *Mar Coast*  
517 *Fish.* 2013; 5(1):11-20.
- 518 30. Clavel J, Merceron G, Escarguel G. Missing data estimation in morphometrics: how much is  
519 too much? *Syst Biol.* 2014; 63(2)203-218.
- 520 31. Hildebrand SF. Family Clupeidae. Pages 314-331 In: *Fishes of western North Atlantic*. Sears  
521 Found. Mar. Res. Mem. 1963; 1(3).
- 522 32. Greene KE, Zimmerman JL, Laney RW, Thomas-Blate JC. 2009. Atlantic coast diadromous  
523 fish habitat: A review of utilization, threats, recommendations for conservation, and research  
524 needs. Atlantic States Marine Fisheries Commission, Washington, DC. Habitat Management  
525 Series No. 9.
- 526 33. Smith JP. Hickory Shad *Alosa mediocris* (Mitchill) stock identification using morphometric  
527 and meristic characters. MS thesis, East Carolina University, Greenville, NC. 2017.
- 528 34. Whitehead PJP. Food and Agriculture Organization species catalogue, volume 7, clupeoid  
529 fishes of the world (suborder Clupeioidi), part I: An annotated and illustrated catalogue of  
530 the herrings, sardines, pilchards, sprats, shads, anchovies and wolf-herrings (Chirocentridae,  
531 Clupeidae and Pristigasteridae). *FAO Fish Synopsis* 1985; No. 125: 1-303.

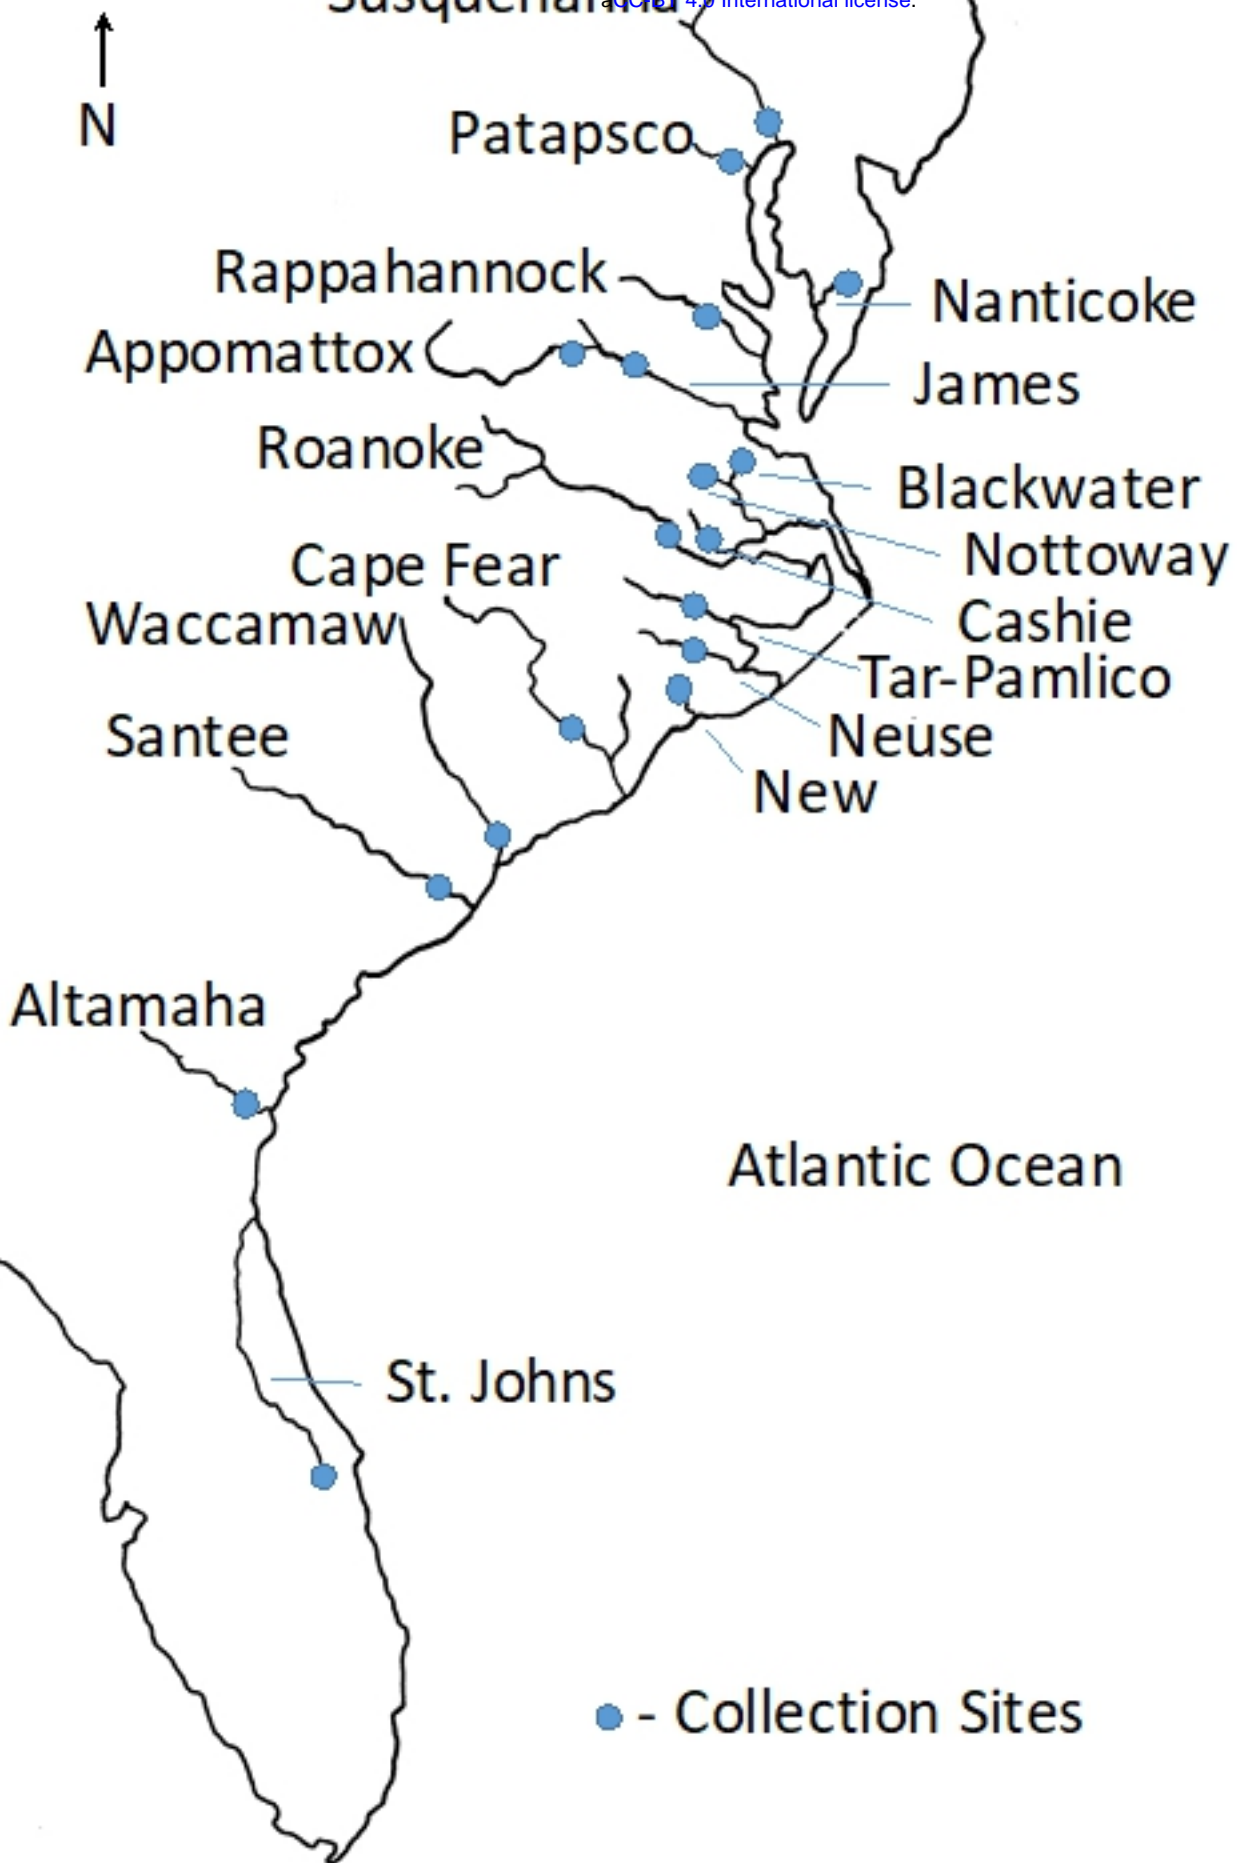

Figure

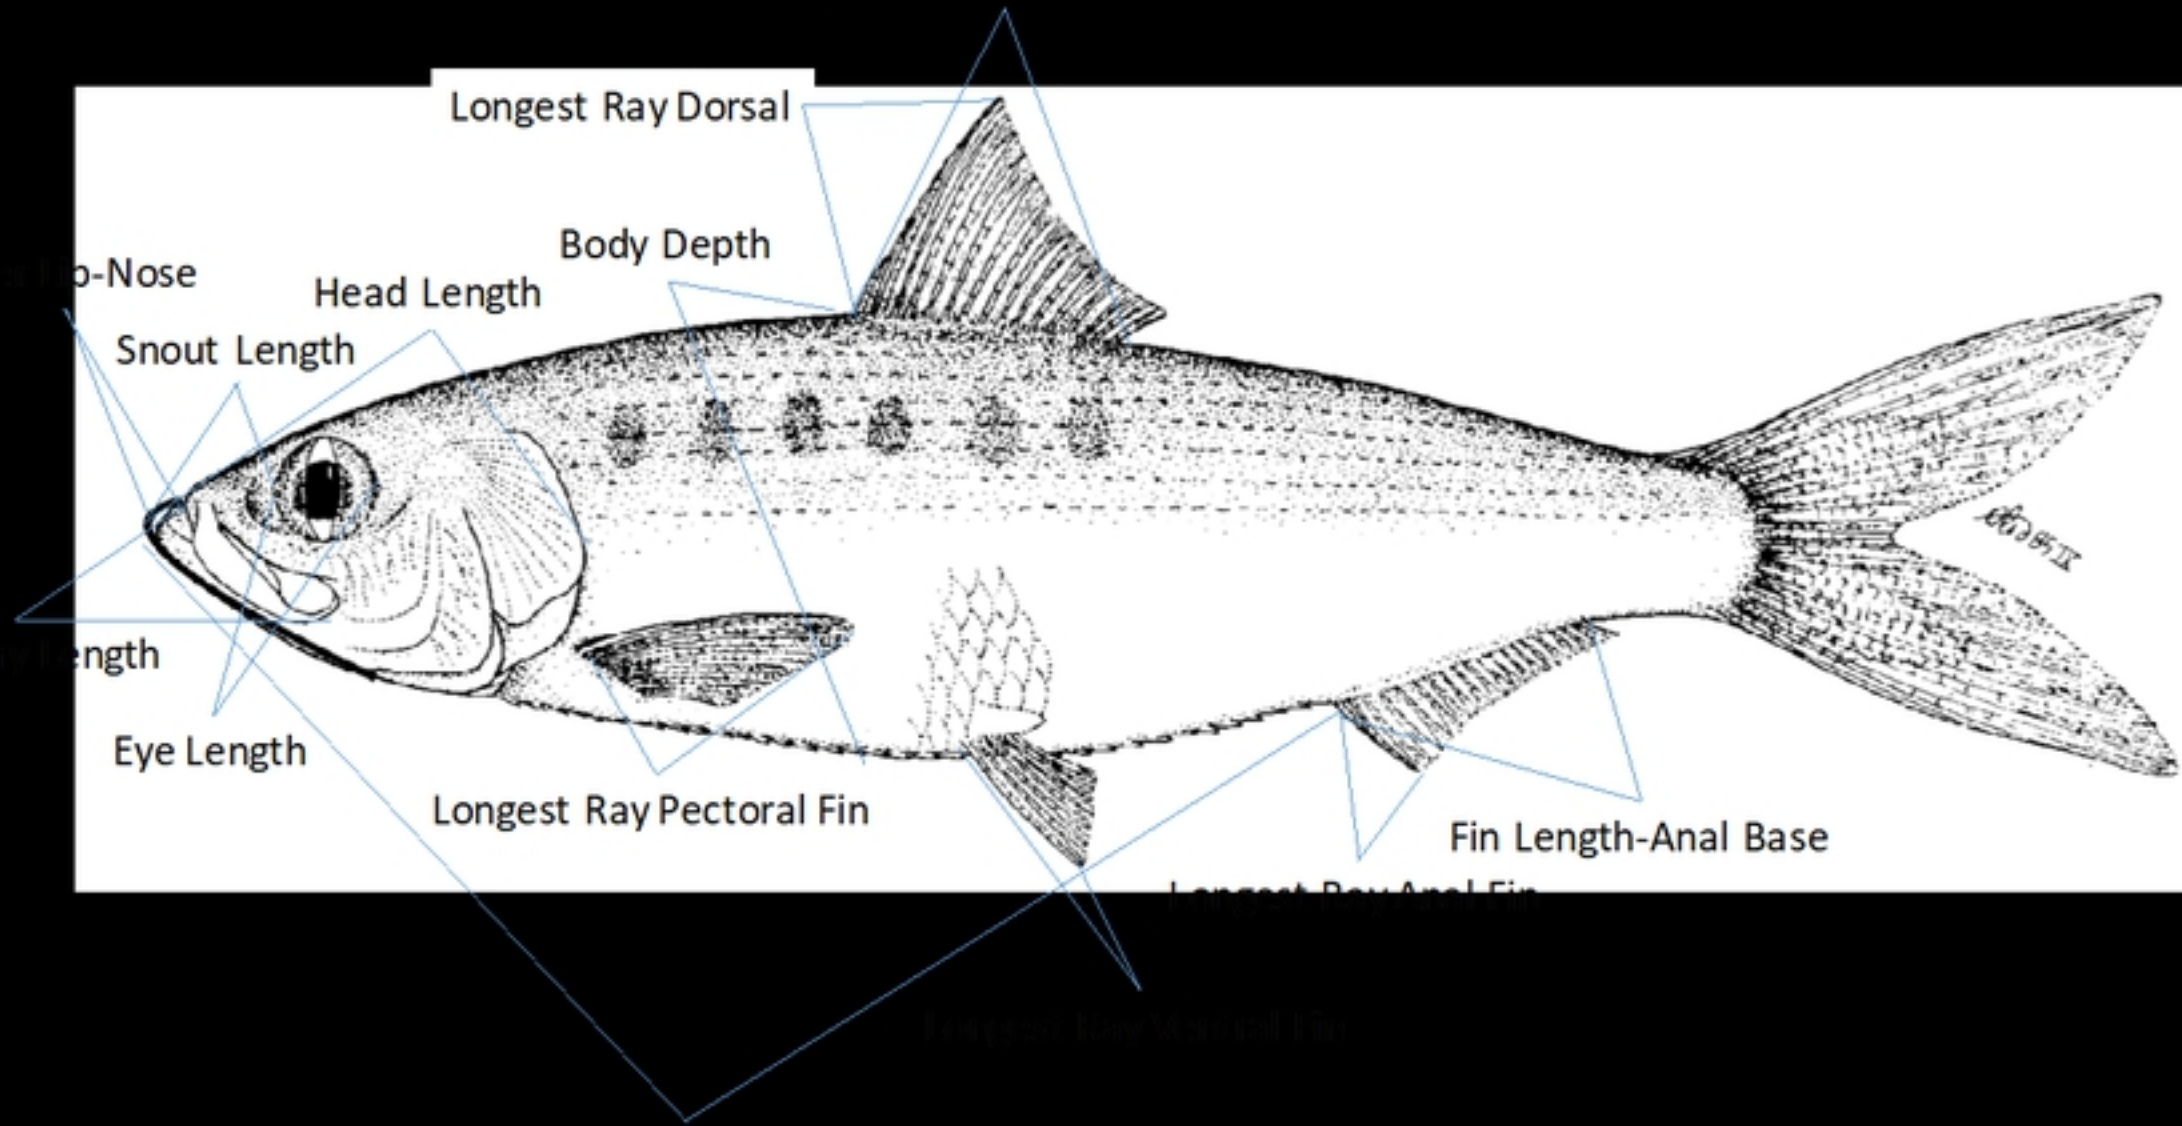

Figure
